# Supplementary material for: Immune Activation Following Vaccination of Streptococcus iniae Bacterin in Asian Seabass (Lates calcarifer, Bloch 1790)
Source: MDPI journal article supplement (doi:10.3390/vaccines11020351), 2023-02-03
Supplement: s1 [file s1]

**Supplementary Table S1:** The immune related gene expression assessed as mean of threshold cycle (Ct) value.

| Gene                          | Time (hr) | Post-vaccination |         | Post-challenge |         |
|-------------------------------|-----------|------------------|---------|----------------|---------|
|                               |           | Vaccine          | Control | Vaccine        | Control |
| <b>MHC I</b>                  | 12        | 19.375           | 17.805  | 16.728         | 11.200  |
|                               | 24        | 11.166           | 12.955  | 10.080         | 12.512  |
|                               | 48        | 19.498           | 17.607  | 12.015         | 11.428  |
| <b>MHC II</b>                 | 12        | 2.600            | 2.133   | 2.6475         | 1.630   |
|                               | 24        | 3.715            | 3.337   | 2.915          | 3.297   |
|                               | 48        | 4.767            | 2.294   | 1.868          | 2.065   |
| <b>CCL 4</b>                  | 12        | 6.860            | 4.525   | 4.218          | 3.827   |
|                               | 24        | 6.453            | 5.988   | 4.560          | 6.223   |
|                               | 48        | 6.778            | 5.188   | 4.690          | 6.347   |
| <b>IL-1<math>\beta</math></b> | 12        | 13.895           | 16.273  | 17.687         | 13.130  |
|                               | 24        | 11.740           | 11.695  | 11.200         | 13.902  |
|                               | 48        | 20.740           | 16.753  | 14.462         | 14.660  |
| <b>IL-4/13B</b>               | 12        | 6.956            | 12.178  | 17.380         | 8.805   |
|                               | 24        | 11.455           | 15.995  | 8.310          | 10.128  |
|                               | 48        | 16.307           | 14.838  | 12.083         | 13.177  |
| <b>IL-10</b>                  | 12        | 9.240            | 15.225  | 20.778         | 11.895  |
|                               | 24        | 12.224           | 13.460  | 12.988         | 13.865  |
|                               | 48        | 21.354           | 21.230  | 13.822         | 13.435  |
| <b>IgM</b>                    | 12        | 9.545            | 13.142  | 14.733         | 15.382  |

|                                |    |        |        |        |        |
|--------------------------------|----|--------|--------|--------|--------|
| <b>CD4</b>                     | 24 | 12.48  | 11.377 | 14.460 | 14.690 |
|                                | 48 | 16.723 | 14.725 | 13.918 | 14.152 |
|                                | 12 | 3.188  | 4.057  | 8.932  | 8.085  |
| <b>CD8-<math>\alpha</math></b> | 24 | 6.498  | 8.543  | 13.358 | 14.075 |
|                                | 48 | 11.285 | 8.0183 | 9.598  | 10.883 |
|                                | 12 | 19.980 | 17.782 | 18.408 | 19.242 |
|                                | 24 | 17.020 | 16.900 | 20.567 | 18.510 |
|                                | 48 | 8.310  | 18.228 | 19.548 | 19.065 |
